# Supplementary material
Source: PubMed Central journal article supplement (PMC2953894)
Supplement: blood-2010-04-280347_2.pdf [file blood-2010-04-280347_2.pdf]

**(Day1)** Dilute cells to  $0.5-1 \times 10^6$ /ml in RPMI complete/10% FBS. Add 0.5  $\mu$ g/ml PHA-L to culture. Culture cells at 37°C, 5% CO<sub>2</sub> incubator for 48 hours (can go 3 days).

**(Day3)** Wash off PHA and re-suspend in fresh complete RPMI complete/10% FBS with IL-2 (100U/ml) for 3 days.

**(Day6)** Feed PBMC cultures with fresh complete RPMI/10% FBS + 100U/ml IL-2.

**(Day8)** (The day before APO1-3 stimulation) Feed PBMC cultures with fresh complete RPMI/10% FBS + 100U/ml IL-2.

**(Day9)** Re-suspend cells at  $2 \times 10^6$  cells/ml in RPMI complete/10% FBS + 100U/mL IL-2.

Make-up APO1-3 and protein A (1:1 or 1:2) to generate a 2 $\times$  stock of antibody for serial dilution, since this will be diluted 1:1 with cells.

Generate the desired serial dilutions of antibody/protein A, eg., 0.01, 0.05, 0.1, 0.5  $\mu$ g/mL final.

Pipet 100 $\mu$ l of the serial antibody dilutions into 96-well flat-bottom plate in duplicate or triplicate for each sample.

Add 100 $\mu$ l of lymphocytes ( $2 \times 10^6$  cells/ml) into wells.

Incubate plate at 37°C/5% CO<sub>2</sub> over night.

**(Day10)** Stain cells with 7AAD + Annexin V (or PI) and FACS. Can use fixed time (absolute cell numbers) or percentages in calculating cell-death. Absolute numbers: % Cell death at X dosage =  $\{1 - (\text{Live cells at X dosage}/\text{Live cells at 0 dosage})\} \times 100$ .
